# Supplementary material for: Myeloid cell MHC I expression drives CD8+ T cell activation in nonalcoholic steatohepatitis
Source: PubMed Central journal article supplement (PMC10808415; doi:10.3389/fimmu.2023.1302006), 2024-01-11
Supplement: DataSheet_1.pdf [file DataSheet_1.pdf]

# Figure S1

## A

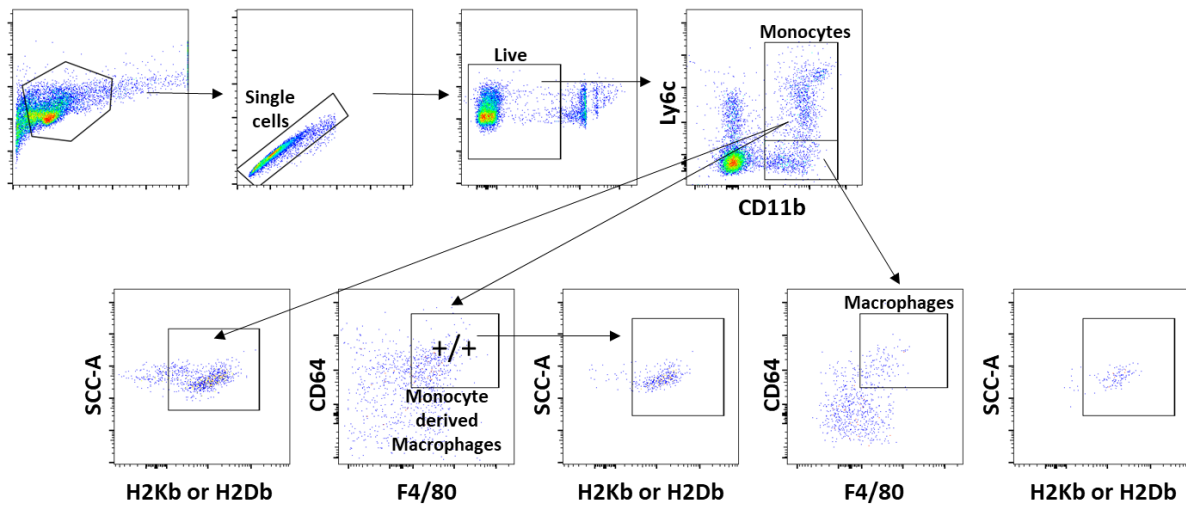

## B

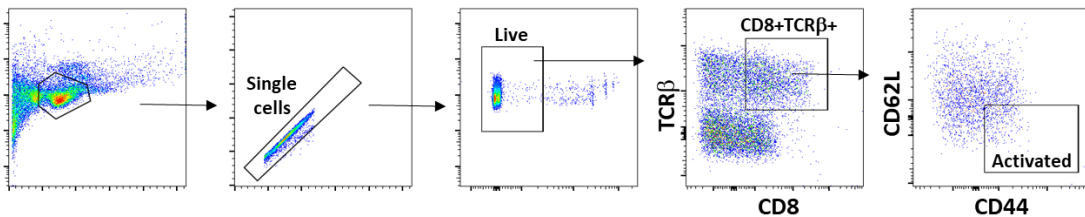

## C

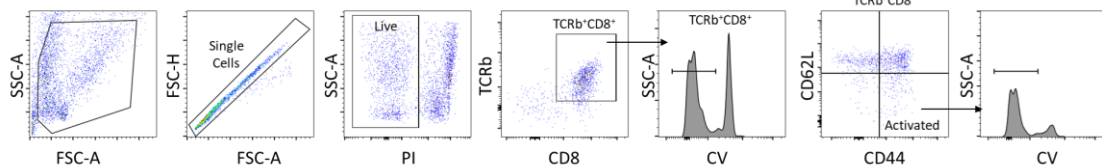

**Figure. S1. Flow cytometry gating strategies.** (A) Myeloid cell flow gating strategies. (B) T cell flow gating strategies. (C) T cell flow gating strategies for T cell activation assays.

# Figure S2

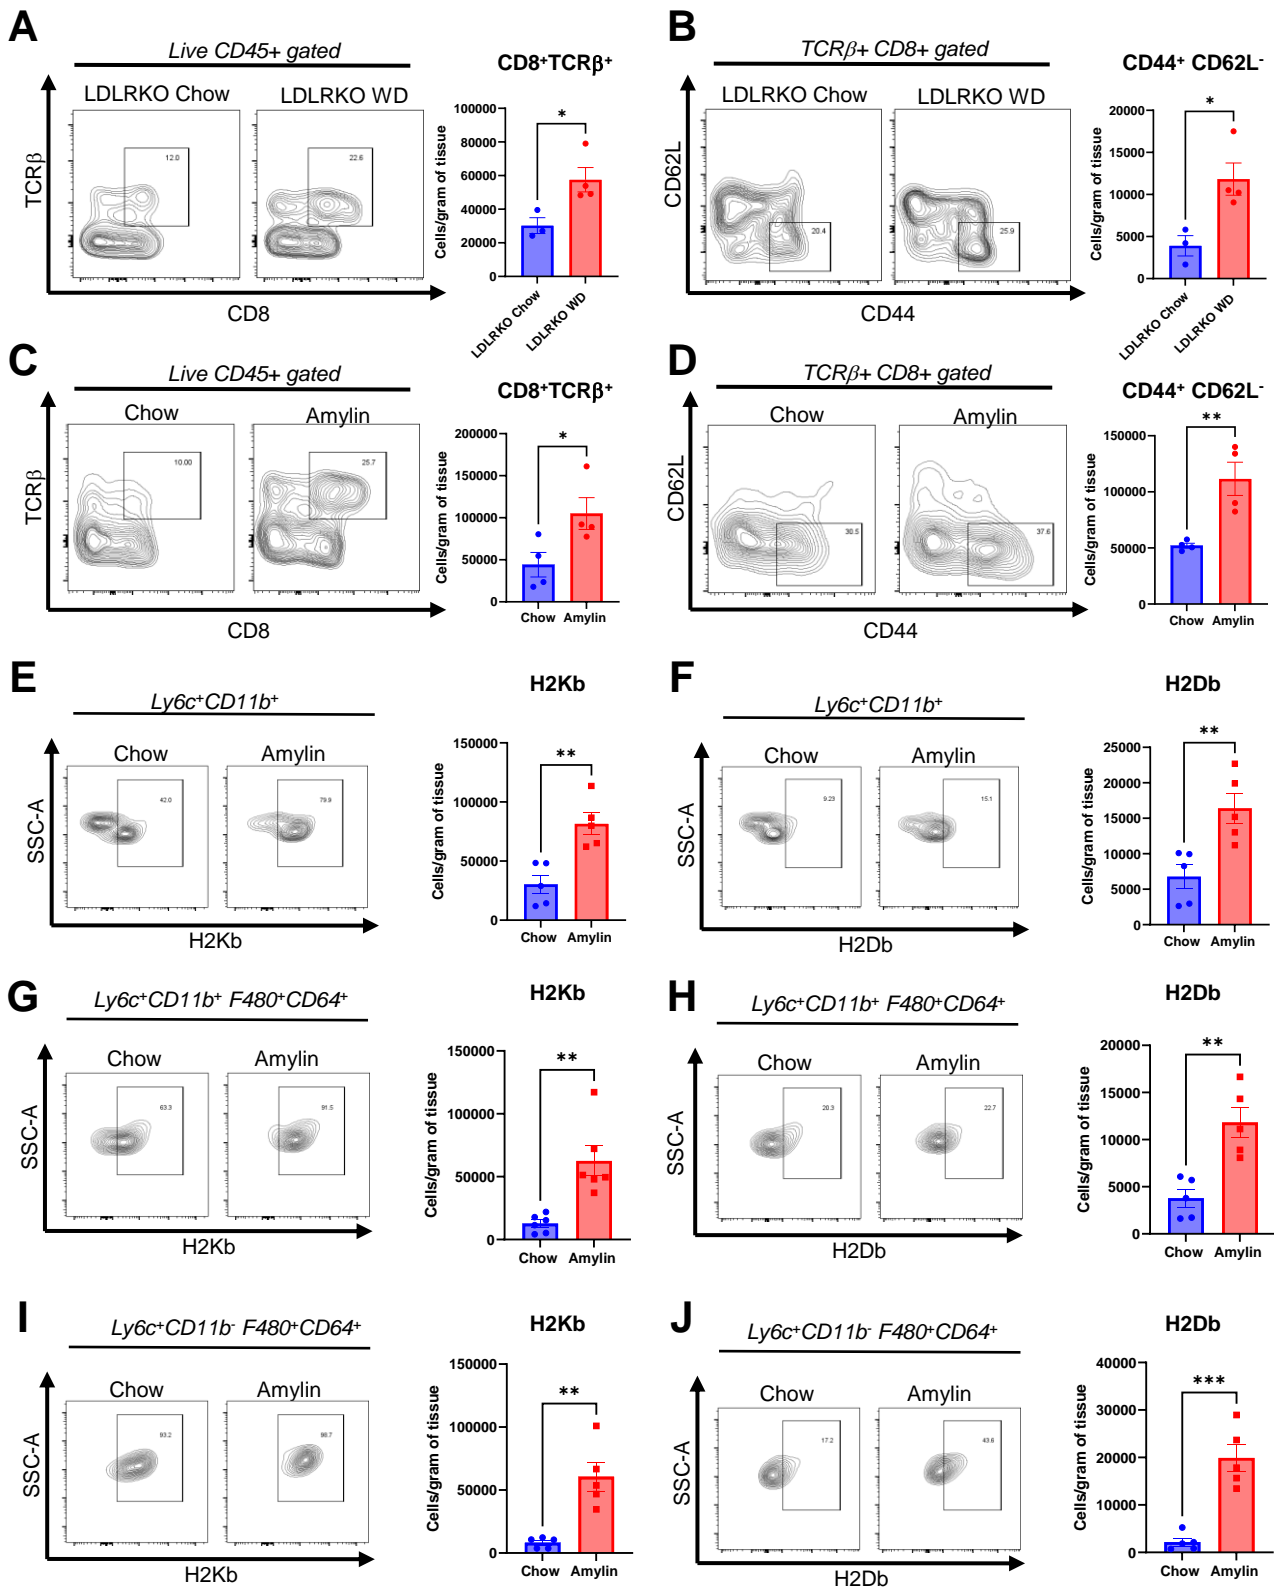

**Figure. S2. CD8<sup>+</sup> T cells are upregulated in NASH with increased H2Kb and H2Db in myeloid cells.** LDLRKO mice on chow or WD for 12 wks (n=3-4 mice per group, 2 replicate studies) (A-B). Taconic mice on chow or amylin diet for 28 wks (n=5 mice per group, 2 replicate studies) (C-D). WT amylin mice on diet for 28 wks (n=4, 2 replicate studies) (E-J). Flow analysis of *CD8<sup>+</sup> TCRb<sup>+</sup>* cells (**A,C**) and activation (*CD44<sup>+</sup>CD62L<sup>-</sup>*) (**B,D**). Representative flow plots of monocyte H2Kb (**E**) and H2Db (**F**) expression. Representative flow plots of monocyte derived macrophage H2Kb (**G**) and H2Db (**H**) expression. Representative flow plots of macrophage H2Kb (**I**) and H2Db (**J**) expression. Data shown as the mean  $\pm$  SEM. Two-tailed unpaired Student's t-tests was performed and considered statistically significant for P<0.05 (\*), P<0.01 (\*\*), and P<0.001(\*\*\*)).

# Figure S3

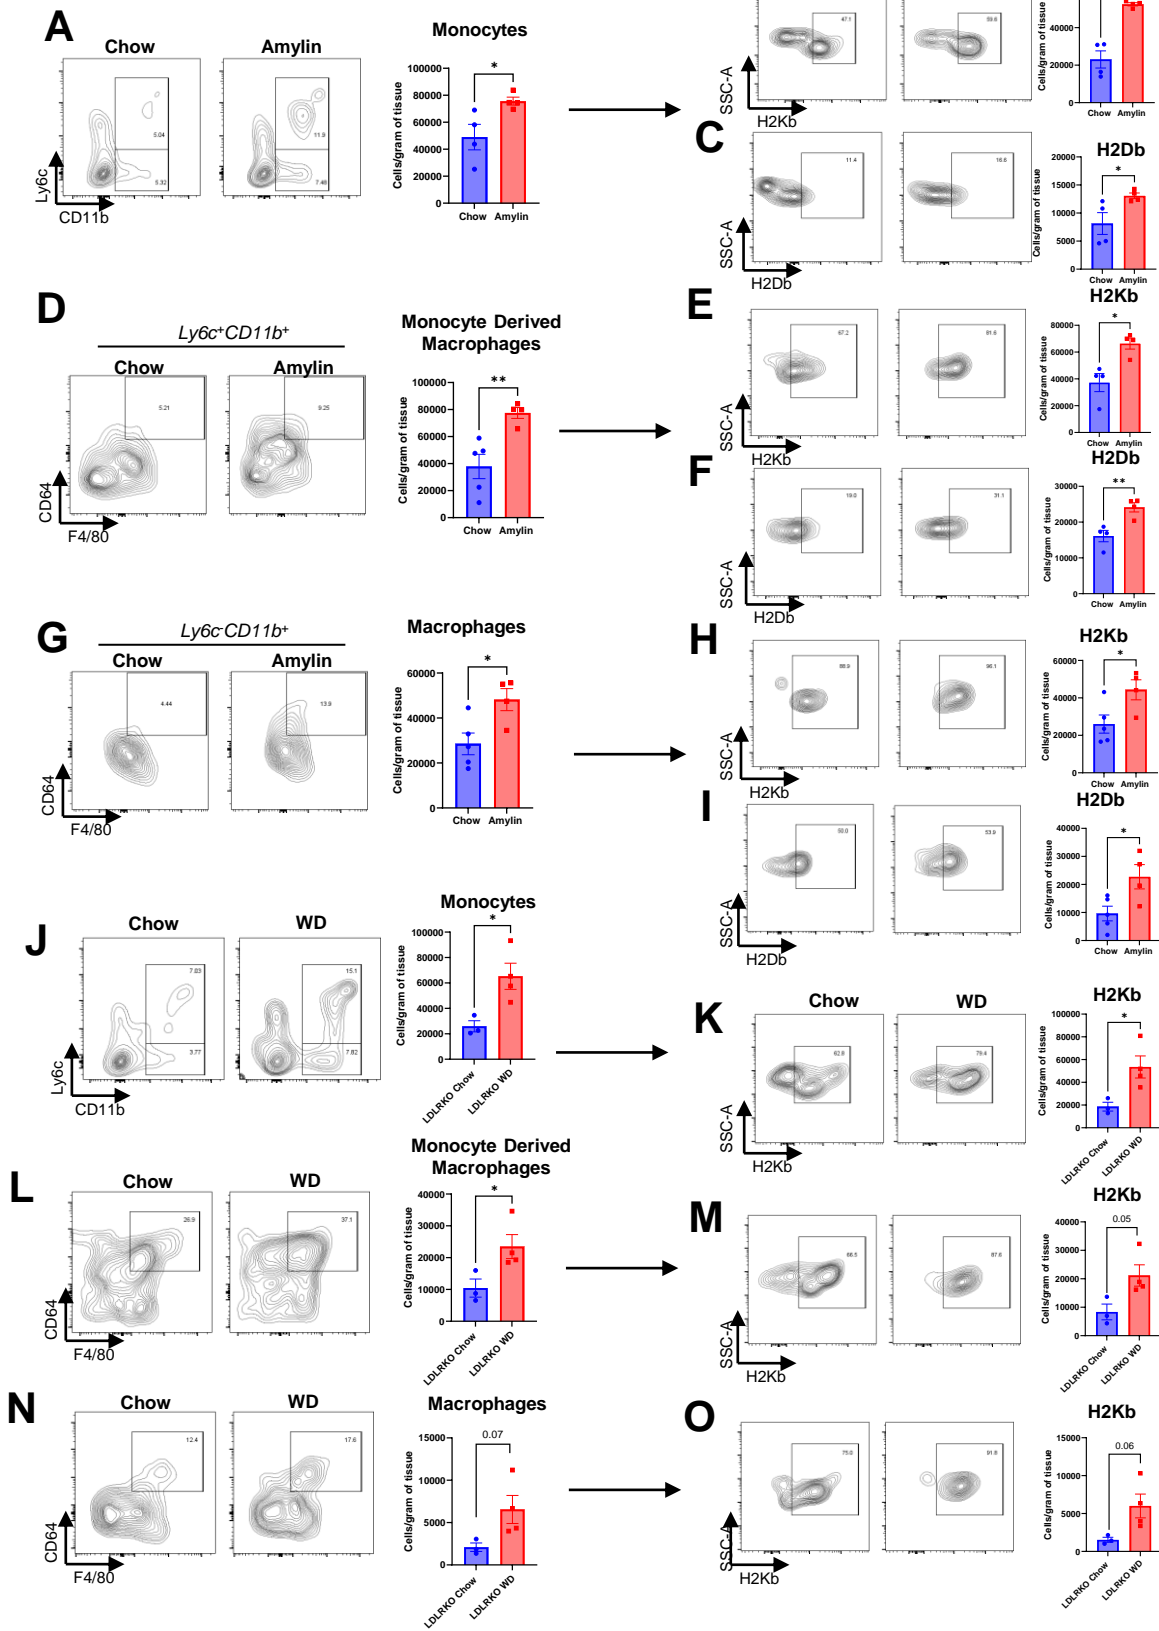

**Figure. S3. H2Kb and H2Db expression is upregulated in NASH myeloid cells.**

Taconic mice on chow or amylin diet for 28 wks (n=4 mice per group, 2 replicate cohorts) (**A-I**). LDLRKO mice on chow or WD for 12 wks (n = 3-4 mice per group, 1 cohort) (**J-O**). Taconic model flow analysis of monocytes ( $Ly6c^+CD11b^+$ ) (**A**), monocyte H2Kb expression (**B**), and monocyte H2Db expression (**C**). Flow analysis of monocyte derived macrophages ( $Ly6c^+CD11b^+CD64^+F480^+$ ) (**D**), monocyte derived macrophage H2Kb expression (**E**), and monocyte derived macrophage H2Db expression (**F**). Flow analysis of macrophages ( $Ly6c^-CD11b^+CD64^+F480^+$ ) (**G**), macrophages H2Kb expression (**H**), and macrophages H2Db expression (**I**). LDLRKO model flow analysis of monocytes ( $Ly6c^+CD11b^+$ ) (**J**) and monocyte H2Kb expression (**K**). Flow analysis of monocyte derived macrophages ( $Ly6c^+CD11b^+CD64^+F480^+$ ) (**L**) and monocyte derived macrophage H2Kb expression (**M**). Flow analysis of macrophages ( $Ly6c^-CD11b^+CD64^+F480^+$ ) (**N**) and macrophages H2Kb expression (**O**). Data shown as the mean  $\pm$  SEM. Two-tailed unpaired Student's t-tests was performed and considered statistically significant for  $P < 0.05$  (\*),  $P < 0.01$  (\*\*), and  $P < 0.001$  (\*\*\*)).

# Figure S4

## A

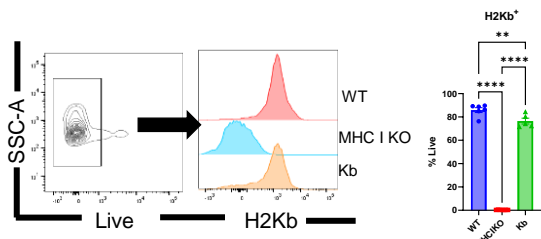

## B

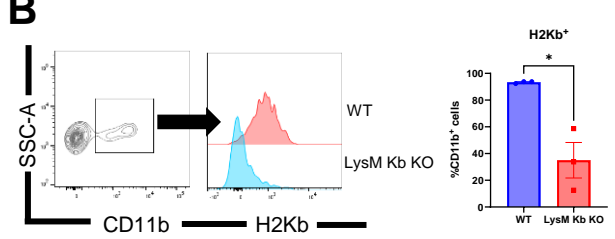

## C

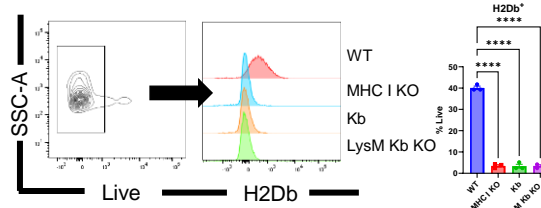

## D

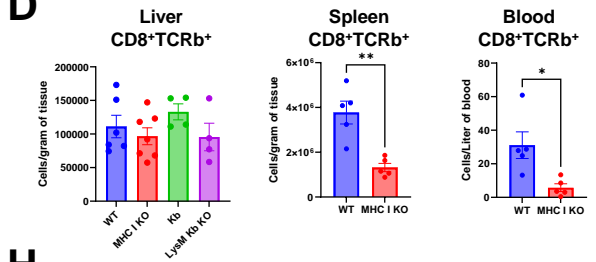

## E

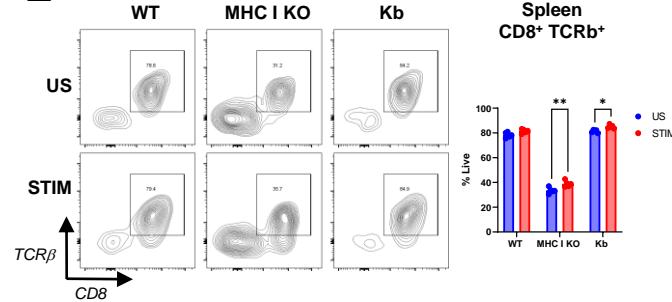

## H

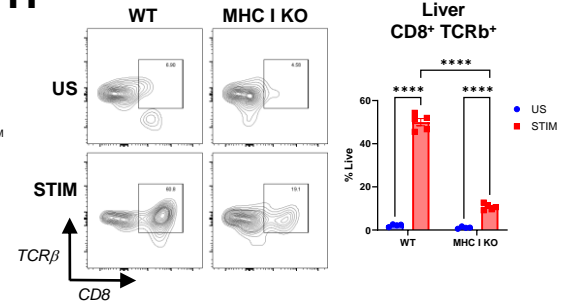

## F

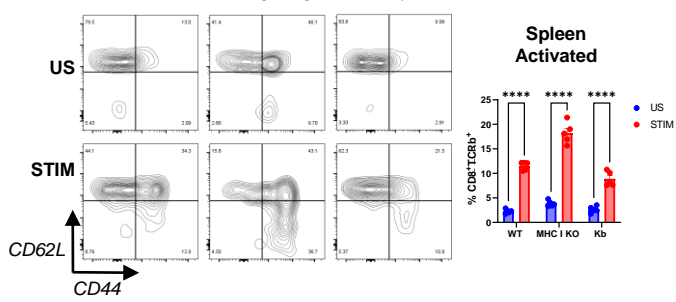

## I

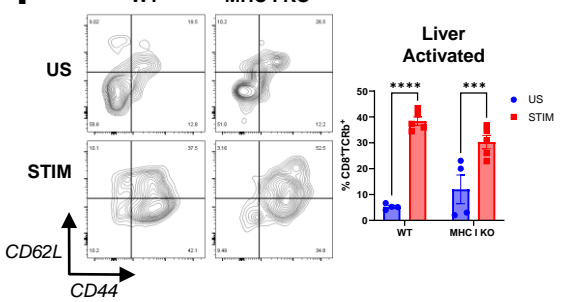

## G

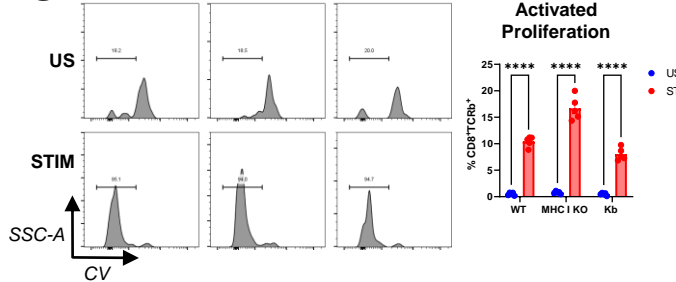

## J

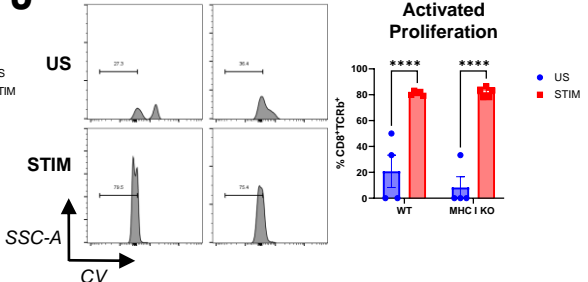

**Figure. S4. Efficient H2Kb and H2Db knockout in MHC I KO, Kb transgenic mice, and Kb KO in myeloid cells with functional spleen CD8<sup>+</sup> T cells.** WT, MHC I KO, Kb, LysM Kb KO chow mice (n=5-7 per group, three cohorts). Representative flow plots of isolated liver cells gated for: **(A)** total H2Kb<sup>+</sup> cells, **(B)** CD11b<sup>+</sup> cells H2Kb<sup>+</sup> expression, and **(C)** total H2Db<sup>+</sup> cells. **(D)** Flow cytometry data for CD8<sup>+</sup>TCRb<sup>+</sup> cells in WT, MHC I KO, Kb, and LysM Kb KO chow mouse livers. T cell activation assay with sorted CD8<sup>+</sup> splenic T cells under stimulated and unstimulated conditions from WT, MHC I KO, and Kb mice harvested after 3 days (n=5, in triplicate). Flow cytometry analysis of CD8<sup>+</sup>TCRb<sup>+</sup> cells **(E)**, activation (CD44<sup>+</sup>, CD62L<sup>-</sup>) **(F)**, and proliferation **(G)**. T cell activation assay with sorted CD8<sup>+</sup> Liver T cells under stimulated and unstimulated conditions from WT or MHC I KO chow mice harvested after 3 days (n=4-5). Flow cytometry analysis of CD8<sup>+</sup>TCRb<sup>+</sup> cells **(H)**, activation (CD44<sup>+</sup>, CD62L<sup>-</sup>) **(I)**, and proliferation **(J)**. Data shown as the mean  $\pm$  SEM. Two-tailed unpaired Student's t-tests for data with two groups and Two-way ANOVA was performed for more than two and was considered statistically significant for P<0.05 (\*), P<0.01 (\*\*), P<0.001(\*\*\*), and P<0.0001(\*\*\*\*).



# Figure S5

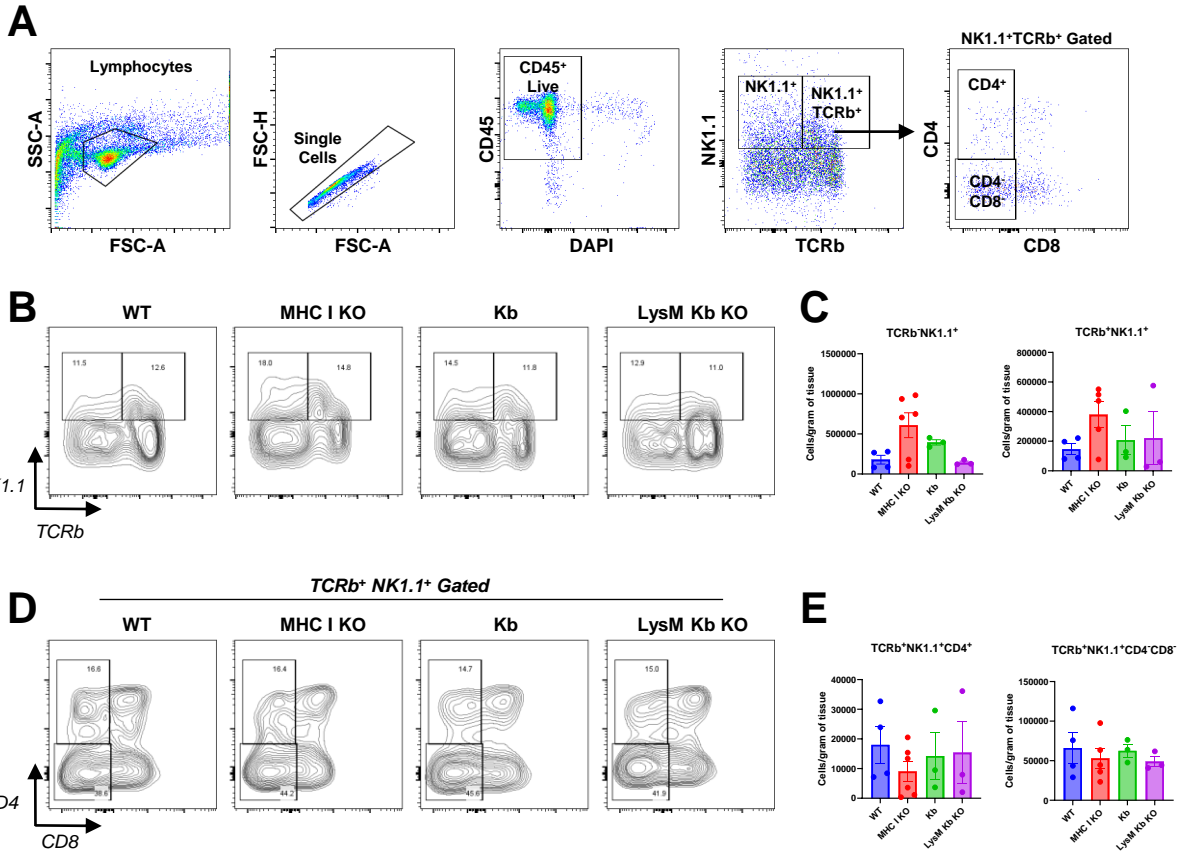

**Figure. S5. NK1.1<sup>+</sup> and NK T cells are not impacted in livers of MHC I KO, Kb, or LysM Kb KO mice.** Female WT, MHC I KO, Kb, and LysM Kb KO chow mice (n=3-6 per group). **(A)** Representative flow gating strategy for NK T cells. **(B-C)** Flow analysis of *NK1.1<sup>+</sup> TCRb<sup>+</sup>* and *NK1.1<sup>+</sup> TCRb<sup>-</sup>* cells. **(D-E)** Flow analysis of *CD4<sup>+</sup> or CD4<sup>-</sup>CD8<sup>-</sup>* expression in *NK1.1<sup>+</sup> TCRb<sup>+</sup>* cells. Data shown as the mean  $\pm$  SEM. One-Way ANOVA was performed.

# Figure S6

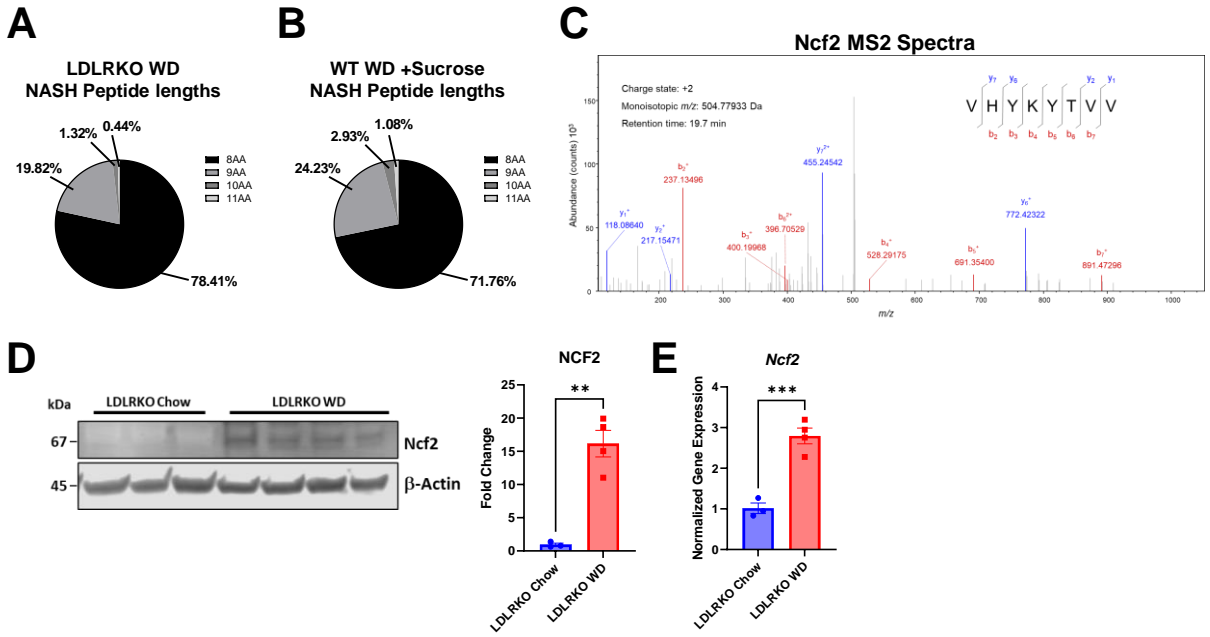

**Figure. S6. NASH Peptide characterization.** LDLRKO mice on WD for 12 wks (n = 3-4 mice per group, 2 replicate cohorts). WT mice on chow or WD and sucrose water for 25 wks (n=5 mice per group, one cohort). **(A)** Unique NASH peptide lengths from LDLRKO NASH model **(A)** and WT NASH model **(B)**. **(C)** LC-MS/MS MS2 Ncf2 spectrum. Total liver Ncf2 protein **(D)** and gene **(E)** expression from LDLRKO NASH model. Data shown as the mean  $\pm$  SEM. Two-tailed unpaired Student's t-tests was performed and considered statistically significant for  $P < 0.01$  (\*\*) and  $P < 0.001$  (\*\*\*)).

# Figure S7

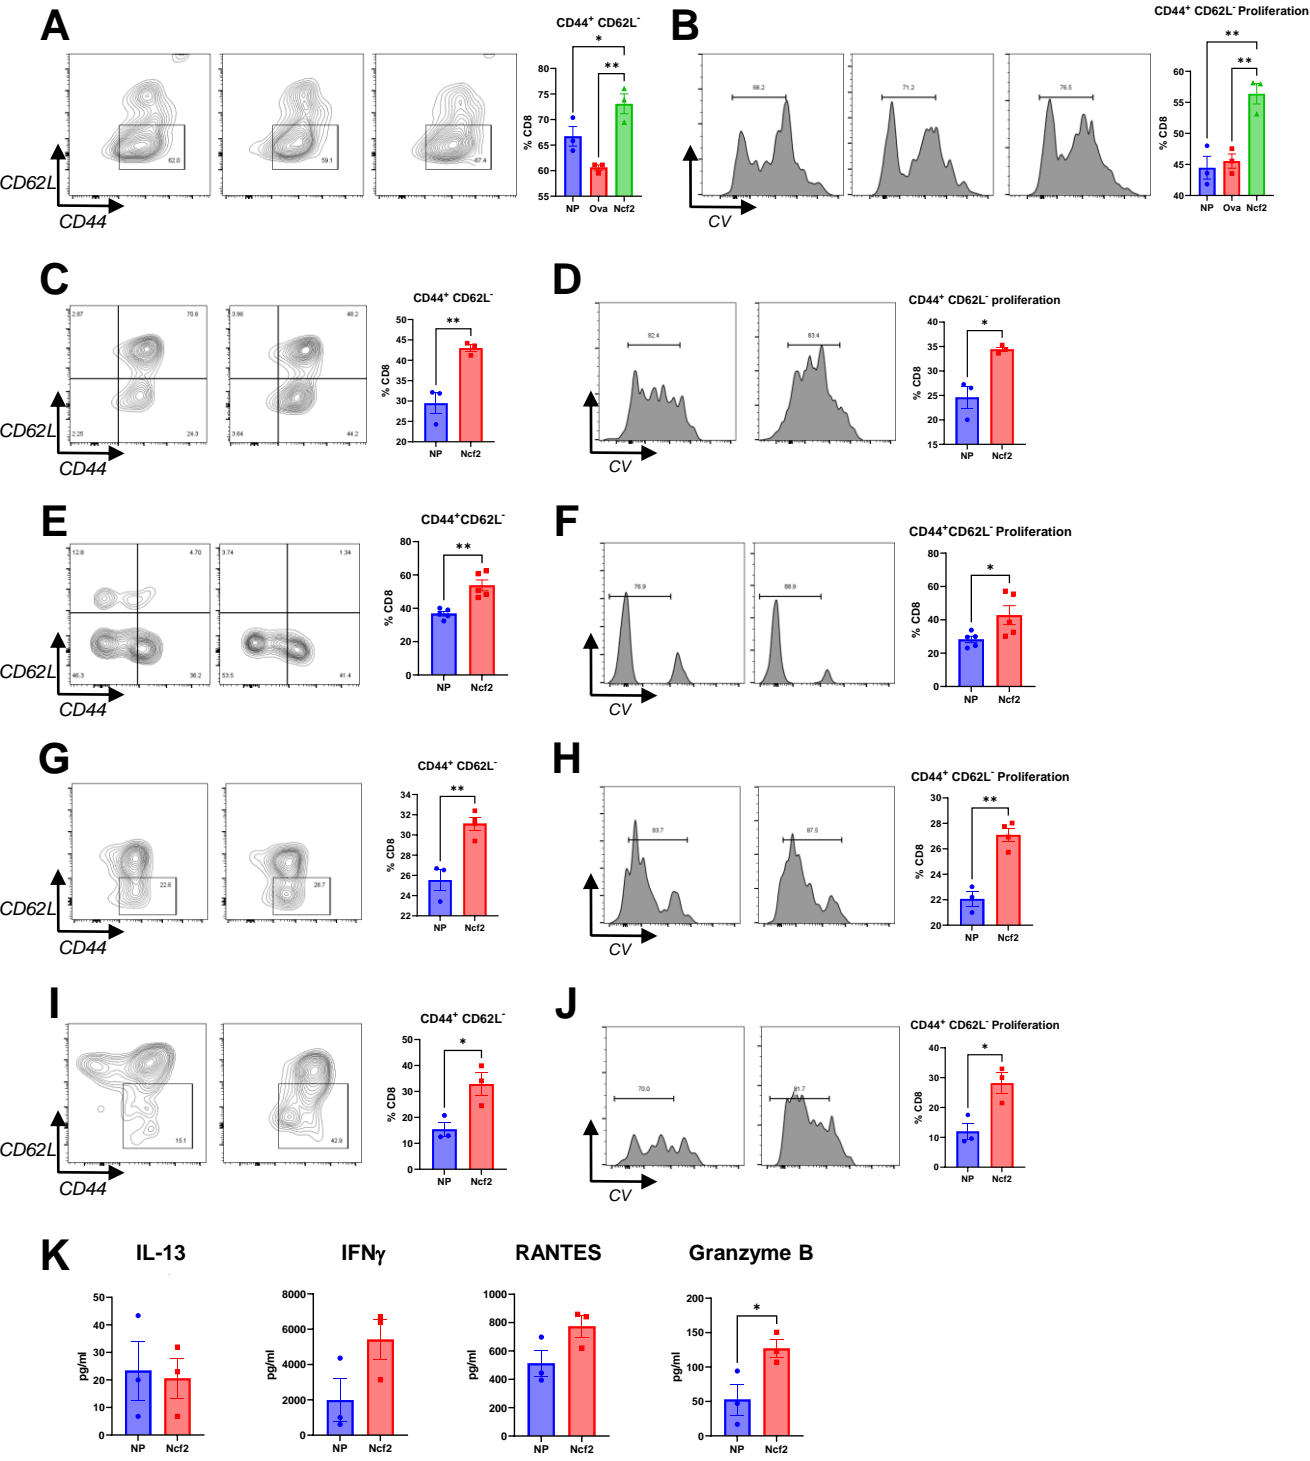

**Figure. S7. Ncf2 peptide activates hepatic CD8<sup>+</sup> T cells and splenic CD8<sup>+</sup> T cells in various models of NASH.** CD8<sup>+</sup> T cells were isolated from livers or spleens of Tac NASH, LDLRKO NASH, or WT NASH models (n = 2 mice combined per trial) done in 3-4 replicate studies and cocultured with NP, Ova, or Ncf2 pulsed RMA-S cells. Flow analysis of hepatic CD8<sup>+</sup> T cell activation (**A**) and proliferation (**B**) in the Tac NASH model after 3 days incubation with peptide pulsed RMA-S cells under stimulated (CD3/CD28) conditions. Flow analysis of splenic CD8<sup>+</sup> T cell activation (**C**) and proliferation (**D**) in the Tac NASH model after 5 days incubation with peptide pulsed RMA-S cells under stimulated conditions. Flow analysis of splenic CD8<sup>+</sup> T cell activation (**E**) and proliferation (**F**) in the Tac NASH model after 5 days incubation with peptide pulsed RMA-S cells under unstimulated conditions supplemented with 100ng/ml IL-2. Flow analysis of splenic CD8<sup>+</sup> T cell activation (**G**) and proliferation (**H**) in the WT NASH model after 5 days incubation with peptide pulsed RMA-S cells. Flow analysis of splenic CD8<sup>+</sup> T cell activation (**I**) and proliferation (**J**) in the LDLRKO NASH model after 5 days incubation with peptide pulsed RMA-S cells. (**K**) Cytokine analysis of media from splenic CD8<sup>+</sup> T cells incubated with Ncf2 peptide pulsed RMA-S cells in the LDLRKO NASH model. Data shown as the mean  $\pm$  SEM. Two-tailed unpaired Student's t-tests was performed for data sets with 2 groups and Two-way ANOVA was performed for groups more than 2 and was considered statistically significant for P<0.05 (\*) and P<0.01 (\*\*).
