# Supplementary material for: Myeloid cell MHC I expression drives CD8+ T cell activation in nonalcoholic steatohepatitis
Source: PubMed Central journal article supplement (PMC10808415; doi:10.3389/fimmu.2023.1302006), 2024-01-11
Supplement: Table_1.pdf [file Table_1.pdf]

TABLE S1. H&amp;E PATHOLOGY SCORING

| <u>SAMPLE ID</u>  | <u>Hepatocyte<br/>Necrosis</u> | <u>Oval Cell<br/>Hyperplasia</u> | <u>Lipid<br/>Accumulation</u> | <u>Lipid<br/>Vacuole<br/>Size</u> | <u>Glycogen</u> | <u>Comments</u>                                                                                                         |
|-------------------|--------------------------------|----------------------------------|-------------------------------|-----------------------------------|-----------------|-------------------------------------------------------------------------------------------------------------------------|
| WT CHOW- 1        | 0                              | 0                                | 0                             | N/A                               | 1               | NSL                                                                                                                     |
| WT CHOW- 2        | 0                              | 0                                | 0                             | N/A                               | 1               | NSL                                                                                                                     |
| WT CHOW- 3        | 0                              | 0                                | 0                             | N/A                               | 1               | NSL                                                                                                                     |
| WT CHOW- 4        | 0                              | 0                                | 0                             | N/A                               | 1               | NSL                                                                                                                     |
| WT AMYLIN- 1      | 0                              | 0                                | 0                             | N/A                               | 1               | NSL                                                                                                                     |
| WT AMYLIN- 2      | 0                              | 0                                | 5                             | Mixed                             | N/A             | Diffuse lipid accumulation, some minimal lymphocytic inflammation                                                       |
| WT AMYLIN- 3      | 0                              | 0                                | 5                             | Mixed                             | N/A             | Diffuse lipid accumulation, some minimal lymphocytic inflammation                                                       |
| WT AMYLIN- 4      | 0                              | 0                                | 5                             | Mixed                             | N/A             | Diffuse lipid accumulation, some minimal lymphocytic inflammation                                                       |
| WT AMYLIN- 5      | 0                              | 0                                | 5                             | Mixed                             | N/A             | Diffuse lipid accumulation, some minimal lymphocytic inflammation                                                       |
| WT AMYLIN- 6      | 2                              | 4                                | 4                             | Macro                             | N/A             | Multifocal yellow pigment in hepatocytes (presumed bile)                                                                |
| MHC I KO CHOW-1   | 0                              | 0                                | 0                             | N/A                               | 0               | NSL                                                                                                                     |
| MHC I KO CHOW-2   | 0                              | 0                                | 0                             | N/A                               | 0               | NSL                                                                                                                     |
| MHC I KO CHOW-3   | 0                              | 0                                | 0                             | N/A                               | 0               | NSL                                                                                                                     |
| MHC I KO CHOW-4   | 0                              | 0                                | 0                             | N/A                               | 0               | NSL                                                                                                                     |
| MHC I KO AMYLIN-1 | 0                              | 0                                | 4                             | Mixed                             | N/A             | Diffuse lipid accumulation, some minimal lymphocytic inflammation                                                       |
| MHC I KO AMYLIN-2 | 0                              | 0                                | 4                             | Mixed                             | N/A             | Diffuse lipid accumulation, some minimal lymphocytic inflammation                                                       |
| MHC I KO AMYLIN-3 | 0                              | 0                                | 4                             | Mixed                             | N/A             | Diffuse lipid accumulation, some minimal lymphocytic inflammation                                                       |
| MHC I KO AMYLIN-4 | 1                              | 0                                | 5                             | Mixed                             | N/A             | Diffuse lipid accumulation, some minimal neutrophilic and mononuclear inflammation                                      |
| KB CHOW-1         | 0                              | 0                                | 0                             | N/A                               | 1               | Diffuse moderate glycogen accumulation                                                                                  |
| KB CHOW-2         | 1                              | 0                                | 0                             | N/A                               | 1               | Diffuse mild glycogen accumulation, neutrophilic inflammation associated with the focus of hepatocyte necrosis          |
| KB CHOW-3         | 1                              | 0                                | 0                             | N/A                               | 1               | Diffuse mild glycogen accumulation, neutrophilic inflammation associated with the focus of hepatocyte necrosis          |
| KB AMYLIN-1       | 2                              | 1                                | 2                             | Macro                             | 0               | Rare clusters of lymphocytes, and macrophages few neutrophils; multifocal yellow pigment in hepatocytes (presumed bile) |
| KB AMYLIN-2       | 0                              | 0                                | 5                             | Mixed                             | N/A             | Diffuse lipid accumulation, some minimal lymphocytic inflammation                                                       |
| KB AMYLIN-3       | 2                              | 4                                | 0                             | N/A                               | N/A             | Multifocal yellow pigment in hepatocytes (presumed bile)                                                                |
| LYSM KB KO CHOW-1 | 0                              | 0                                | 0                             | N/A                               | 0               | NSL                                                                                                                     |
| LYSM KB KO CHOW-2 | 1                              | 0                                | 0                             | N/A                               | 0               | Rare foci of neutrophilic/lymphocytic and histiocytic inflammation                                                      |
| LYSM KB KO CHOW-3 | 3                              | 0                                | 0                             | N/A                               | 0               | Lymphocytes, plasma cells and histiocytes with surrounding hepatocyte degeneration                                      |
| LYSM KB KO CHOW-4 | 1                              | 0                                | 0                             | N/A                               | 0               | Rare clusters of lymphocytes, and histocytes with surrounding hepatocyte degeneration (hepatitis)                       |

|                                |   |   |   |       |     |                            |
|--------------------------------|---|---|---|-------|-----|----------------------------|
| <b>LYSM KB KO<br/>AMYLIN-1</b> | 0 | 0 | 5 | Mixed | N/A | Diffuse lipid accumulation |
| <b>LYSM KB KO<br/>AMYLIN-2</b> | 0 | 0 | 4 | Micro | 1   |                            |
| <b>LYSM KB KO<br/>AMYLIN-3</b> | 0 | 0 | 4 | Mixed | 1   |                            |
| <b>LYSM KB KO<br/>AMYLIN-4</b> | 0 | 0 | 4 | Mixed | 0   |                            |
