# Supplementary material for: Myeloid cell MHC I expression drives CD8+ T cell activation in nonalcoholic steatohepatitis
Source: PubMed Central journal article supplement (PMC10808415; doi:10.3389/fimmu.2023.1302006), 2024-01-11
Supplement: Table_2.pdf [file Table_2.pdf]

Table S2

| Sequence  | Length | Charge | MH+ [Da]   | ΔM [ppm] | RT [min] | Proteins | Protein Accessions                                                   | Mascot   | Sequest | H2Kb binding Affinity(nM) |
|-----------|--------|--------|------------|----------|----------|----------|----------------------------------------------------------------------|----------|---------|---------------------------|
|           |        |        |            |          |          |          |                                                                      | IonScore | q-value |                           |
| AALIYGKL  | 8      | 2      | 848.52402  | -0.7     | 25.4304  | 1        | Q9DC23                                                               |          | 0.0070  | 47.49                     |
| AAYSYFRL  | 8      | 2      | 990.50434  | 0.1      | 29.6579  | 1        | Q8R4U0                                                               |          | 0.0070  | 2.83                      |
| AGPSRTVGL | 9      | 2      | 857.48394  | -0.29    | 18.168   | 1        | Q64521                                                               |          | 0.0037  | 860.84                    |
| AQYRFIYM  | 8      | 2      | 1107.52918 | 0.92     | 25.2868  | 2        | P35235, P35235-2                                                     |          | 0.0078  | 9.12                      |
| ATYSYKEAL | 9      | 2      | 1045.52005 | 0.01     | 21.026   | 1        | Q8R349                                                               |          | 0.0037  | 29.22                     |
| AVHEFQNL  | 8      | 2      | 957.47886  | -0.82    | 21.0445  | 1        | Q8VCB3                                                               |          | 0.0420  | 16.64                     |
| EAYRFTGL  | 8      | 2      | 956.48361  | 1.43     | 26.3243  | 2        | Q8K015, Q8K015-2                                                     |          | 0.0037  | 16.66                     |
| EIVSFQHL  | 8      | 2      | 972.51491  | -0.59    | 27.935   | 1        | Q8R502                                                               |          | 0.0037  | 452.69                    |
| EPPVYANL  | 8      | 2      | 902.46181  | 0.71     | 29.7156  | 1        | P05627                                                               |          | 0.0037  | 4414.99                   |
| HVYFPAHL  | 8      | 2      | 1049.52033 | 1.38     | 25.9122  | 1        | Q80SU7                                                               |          | 0.0037  | 3.27                      |
| IFYYYQKL  | 8      | 2      | 1073.60299 | -0.61    | 29.4592  | 1        | Q69ZR2                                                               |          | 0.0037  | 42.01                     |
| INLNYKDL  | 8      | 2      | 992.54112  | -1.29    | 26.4768  | 1        | Q9CY50                                                               |          | 0.0490  | 49.34                     |
| INQIYEARV | 9      | 2      | 1105.60003 | -0.45    | 21.8794  | 1        | Q8K2H4                                                               |          | 0.0037  | 136.61                    |
| IPPEYRHL  | 8      | 2      | 1024.55744 | -0.38    | 18.0785  | 7        | P51125-4, P51125-7, P51125-6, P51125-5, P51125-1, P51125-3, P51125-2 |          | 0.0037  | 845.23                    |
| ISLDYQHL  | 8      | 2      | 988.50982  | -0.81    | 27.4757  | 1        | Q5SYL3                                                               |          | 0.0057  | 7.82                      |
| ITFIKSL   | 8      | 2      | 968.58153  | 0.76     | 34.9107  | 1        | Q9JLN9                                                               |          | 0.0044  | 3.3                       |
| KNIRFPLM  | 8      | 2      | 1018.58663 | 0.02     | 25.7934  | 6        | Q80TF4-2, Q80TF4-5, Q80TF4-4, Q80TF4, Q80TF4-3, Q6ZPT1               |          | 0.0037  | 14.07                     |
| KNVTFHGI  | 8      | 2      | 915.50468  | -0.12    | 18.1704  | 1        | P19096                                                               |          | 0.0037  | 89.31                     |
| KNYDFAQV  | 8      | 2      | 984.47852  | -0.45    | 22.3666  | 3        | Q8BGF7-2, Q8BGF7, Q8BGF7-3                                           |          | 0.0057  | 7.09                      |
| KSLEIRTL  | 8      | 2      | 959.58841  | -0.68    | 19.3302  | 4        | Q61301-2, Q61301-3, P26231, Q61301                                   |          | 0.0037  | 417.45                    |
| KTLEHINAI | 9      | 2      | 1038.59422 | -0.29    | 18.3673  | 1        | P16301                                                               |          | 0.0400  | 809.08                    |
| KVLEFERV  | 8      | 2      | 1019.58841 | -0.64    | 21.0608  | 1        | Q8CEC6                                                               |          | 0.0037  | 136.24                    |
| QVVQFNRL  | 8      | 2      | 1003.56834 | -1.39    | 24.1097  | 1        | O88653                                                               |          | 0.0037  | 62.22                     |
| RAFLFNKV  | 8      | 2      | 994.58326  | -1.19    | 23.9096  | 1        | P62700                                                               |          | 0.0037  | 16.16                     |
| RSYNMPSL  | 8      | 2      | 967.46658  | -0.8     | 23.6594  | 2        | Q91ZV0, Q8R311                                                       |          | 0.0037  | 31.18                     |
| SAARFFQL  | 8      | 2      | 939.50468  | 0.72     | 29.9437  | 1        | Q9QY30                                                               |          | 0.0037  | 10.13                     |
| SALIYSNL  | 8      | 2      | 880.47746  | -0.06    | 32.1398  | 1        | O55013                                                               |          | 0.0037  | 4.45                      |
| SALKYYQL  | 8      | 2      | 985.53531  | -0.79    | 25.0987  | 2        | Q6ZPU9-1, Q6ZPU9-3                                                   |          | 0.0037  | 10.19                     |
| SEYRYTLL  | 8      | 2      | 1044.53604 | -0.45    | 27.2462  | 1        | Q9D1Q6                                                               |          | 0.0037  | 49.3                      |
| SGPDLSTAL | 9      | 2      | 860.43599  | -0.25    | 28.9577  | 1        | Q91VS7                                                               |          | 0.0340  | 1268.48                   |
| SNPEFRQL  | 8      | 2      | 990.50032  | -0.34    | 20.6513  | 1        | Q3UWM4                                                               |          | 0.0078  | 50.52                     |
| SSAEFHSL  | 8      | 2      | 877.40502  | -0.08    | 19.4898  | 1        | Q61810-1                                                             |          | 0.0037  | 16.85                     |
| SSVLYSRV  | 8      | 2      | 910.49926  | -0.2     | 20.196   | 1        | Q8CGC7                                                               |          | 0.0037  | 14.48                     |
| SSYRFVQNV | 9      | 2      | 1099.55308 | 0.39     | 22.4486  | 1        | P42128                                                               |          | 0.0044  | 4.2                       |
| STFVYNTM  | 8      | 2      | 978.42371  | 0.42     | 24.1463  | 1        | Q8CFB4                                                               |          | 0.0037  | 6.13                      |
| SVYTHSYL  | 8      | 2      | 969.46762  | 0.83     | 21.5721  | 5        | Q3TZX8-3, Q3TZX8-2, Q8K0L2-2, Q8K0L2, Q3TZX8-1                       |          | 0.0037  | 5.74                      |
| TIILFTKV  | 8      | 2      | 934.59718  | -1.27    | 31.8743  | 2        | Q8K2V6-2, Q8K2V6-1                                                   |          | 0.0044  | 43.16                     |
| TNISFTNM  | 8      | 2      | 943.41896  | 0.3      | 24.212   | 1        | Q9CY77                                                               |          | 0.0240  | 10.67                     |
| TNVLFNHL  | 8      | 2      | 957.51524  | -0.57    | 27.9848  | 1        | Q9D706                                                               |          | 0.0037  | 16.43                     |
| TTYRFPPEL | 8      | 2      | 1026.52547 | 0.2      | 29.1235  | 2        | Q8K440, Q8K440-2                                                     |          | 0.0096  | 3.08                      |
| TVPELTQQM | 9      | 2      | 1062.51359 | 0.12     | 22.6054  | 6        | Q7TMM9, Q9D6F9, Q9ERD7, P68372, Q9CWF2, Q922F4                       |          | 0.0044  | 3132.55                   |
| VFYEREVQM | 9      | 2      | 1200.57177 | 0.35     | 24.5077  | 1        | Q80SY3                                                               |          | 0.0037  | 95.16                     |
| VGYRQPLV  | 8      | 2      | 931.53598  | -0.76    | 21.0133  | 1        | P97370                                                               |          | 0.0046  | 137.01                    |
| VHYKYTVV  | 8      | 2      | 1008.55129 | -0.22    | 18.6048  | 1        | O70145                                                               |          | 0.0037  | 40.94                     |
| VIFNYKGNV | 10     | 3      | 1181.66772 | -0.38    | 19.3954  | 1        | P14211                                                               |          | 0.0037  | 424.81                    |
| VITNFSARI | 9      | 2      | 1020.58366 | 0.61     | 25.3305  | 2        | Q3UVL4-1, Q3UVL4-2                                                   |          | 0.0037  | 48.12                     |
| VIVRFLTV  | 8      | 2      | 946.60841  | -1.32    | 32.6811  | 1        | P62245                                                               |          | 0.0044  | 19.64                     |
| VMYRVIQV  | 8      | 2      | 1007.57065 | 0.02     | 26.3151  | 1        | Q61069                                                               |          | 0.0037  | 32.58                     |
| VNLVFEKI  | 8      | 2      | 961.57169  | -0.82    | 30.0931  | 4        | Q6AW69-4, Q6AW69-5, Q6AW69-1, Q6AW69-3                               |          | 0.0037  | 51.25                     |
| VNRVFDKL  | 8      | 2      | 990.57309  | -0.72    | 20.0245  | 1        | P28076                                                               |          | 0.0037  | 50.28                     |
| VNSIFQHL  | 8      | 2      | 957.51524  | 0.07     | 28.0498  | 1        | Q80SU7                                                               |          | 0.0037  | 16.64                     |
| VNVYKEL   | 8      | 2      | 967.49173  | 0.27     | 28.3798  | 1        | Q8BKT7                                                               |          | 0.0037  | 33.28                     |
| VNYPRKIGA | 9      | 2      | 1017.58399 | -0.86    | 17.0715  | 1        | O35488                                                               |          | 0.0037  | 475.37                    |
| VQYEMRTL  | 8      | 2      | 1055.51901 | -1.08    | 18.5278  | 1        | Q80ZK0                                                               |          | 0.0037  | 27.17                     |
| VSTKFEHL  | 8      | 2      | 960.51491  | -0.03    | 17.972   | 1        | B2RXC1                                                               |          | 0.0037  | 27.81                     |
| VSYWFDQRF | 9      | 2      | 1247.58438 | 0.3      | 34.0188  | 1        | P54751                                                               |          | 0.0037  | 15.32                     |
| VTITFKNM  | 8      | 2      | 953.51246  | 0.1      | 25.2831  | 2        | Q8R4Y4, Q8R4Y4-2                                                     |          | 0.0037  | 8.71                      |
| VVAEFGRI  | 8      | 2      | 890.50943  | 0.36     | 24.6606  | 1        | Q8BXC6                                                               |          | 0.0120  | 79.83                     |
| VVYIYRQI  | 8      | 2      | 1053.60914 | 1.19     | 25.6224  | 7        | Q62417-3, Q62417-5, Q62417-2, Q62417-4, Q62417, Q62417-7, Q62417-6   |          | 0.0300  | 6.35                      |
